# Supplementary material
Source: PubMed Central journal article supplement (PMC2795552)
Supplement: 0907844106_ST1_PDF.pdf [file 0907844106_ST1_PDF.pdf]

**Table S1. Relevant information of the excavation sites on the Tibetan Plateau.**

| Label on Figure 1 | Excavation Site        | Estimated Date (kya) | Method for Date Estimation        | Location                                                                                   | References |
|-------------------|------------------------|----------------------|-----------------------------------|--------------------------------------------------------------------------------------------|------------|
| a                 | Pulan                  | 10-50                | Comparison of stoneware           | Ali, Tibet (3700 m. a. s. l.)                                                              | (1)        |
| b                 | Quesang                | 18-24                | Optically stimulated luminescence | Lhasa, Tibet (4200 m. a. s. l.)                                                            | (2)        |
| c                 | Selincuo               | 30-40                | Radiocarbon dating                | Bange, Nakchu, Tibet (4600 m. a. s. l.)                                                    | (3)        |
| d                 | Duogeze                | 10-50                | Comparison of stoneware           | Shenza, Nakchu, Tibet (4830 m. a. s. l.)                                                   | (4)        |
| e                 | Zhuluole               | 10-50                | Comparison of stoneware           | Shenza, Nakchu, Tibet (4800 m. a. s. l.)                                                   | (4)        |
| f                 | Sure                   | 10-50                | Comparison of stoneware           | Dingri, Shigatse, Tibet (4500 m. a. s. l.)                                                 | (4)        |
| g                 | Luling                 | 10-50                | Comparison of stoneware           | Shenza, Nakchu, Tibet (4700 m. a. s. l.)                                                   | (4)        |
| h                 | Hadongtang & Quedetang | 10-50                | Comparison of stoneware           | Jilong, Shigatse, Tibet (4100 m. a. s. l.)                                                 | (4)        |
| i                 | Zhabu                  | 10-50                | Comparison of stoneware           | Ritu, Ali, Tibet (4500 m. a. s. l.)                                                        | (4)        |
| j                 | Xiadacuo               | 10-50                | Comparison of stoneware           | Ritu, Ali, Tibet (4500 m. a. s. l.)                                                        | (5)        |
| k                 | Heimahe & Jiangxigou   | 11-15                | Radiocarbon dating                | Gonghe, Hainan Tibetan Autonomous Prefecture, Qinghai (3210 m. a. s. l.; 3330 m. a. s. l.) | (6)        |
| l                 | XiaoQaidam             | 30-36                | Radiocarbon dating of ostracods   | Haixi Mongolian and Tibetan Autonomous Prefecture, Qinghai (3100 m. a. s. l.)              | (4)        |

Notes: m. a. s. l. = meters above sea level.

1. Shi S (1992) The value of archaeological findings in the Tibetan Stone Age for understanding Tibetan ancient culture. *China Tibetology* 53-63.

2. Zhang DD, Li SH (2002) Optical dating of Tibetan human hand- and footprints: an implication for the palaeoenvironment of the last glaciation of the Tibetan

Plateau. *Geophys Res Lett* 29:1072-1074.

3. Yuan B, Huang W, Zhang D (2007) New evidence for human occupation of the northern Tibetan Plateau, China during the Late Pleistocene. *Chin Sci Bull* 52:2675-2679.
4. Aldenderfer M, Zhang Y (2004) The prehistory of the Tibetan Plateau to the seventh century AD: perspectives and research from China and the West since 1950. *J World Prehist* 18:1-55.
5. Li Y-X (2000) in *Original Art in Tibet*, (Hebei Education Press, Hebei), pp 10-37.
6. Madsen DB, *et al.* (2006) The Late Upper Paleolithic occupation of the northern Tibetan Plateau margin. *J Archaeol Sci* 33:1433-1444.
