# Supplementary material
Source: PubMed Central journal article supplement (PMC2795552)
Supplement: 0907844106_ST2_PDF.pdf [file 0907844106_ST2_PDF.pdf]

**Table S2. Populations under study**

| Code | G* | Population        | Language Affiliation <sup>†</sup> | N <sup>‡</sup> | Sample Location              | References |
|------|----|-------------------|-----------------------------------|----------------|------------------------------|------------|
| 1    | NE | Daur              | Mongolic                          | 45             | Inner Mongolia               | (1)        |
| 2    | NE | Ewenki            | Tungusic                          | 47             | Inner Mongolia               | (1)        |
| 3    | NE | Oroqen            | Tungusic                          | 44             | Inner Mongolia               | (1)        |
| 4    | NE | Kazak             | Turkic                            | 53             | Kashen, Xinjiang             | (2, 3)     |
| 5    | NE | Uzbek             | Turkic                            | 58             | Yili, Xinjiang               | (2)        |
| 6    | NE | Uygur             | Turkic                            | 47             | Yili/Kashen, Xinjiang        | (2, 3)     |
| 7    | NE | Mongolian_1       | Mongolic                          | 48             | Inner Mongolia               | (1)        |
| 8    | NE | Mongolian_2       | Mongolic                          | 49             | Yili, Xinjiang               | (2)        |
| 9    | NE | Korean_1          | Koreanic                          | 48             | Inner Mongolia               | (1)        |
| 10   | NE | Korean_2          | Koreanic                          | 55             | Yan Bian, Jilin              | (4)        |
| 11   | NE | Hui               | Sinitic                           | 45             | Yili, Xinjiang               | (2)        |
| 12   | NE | Dongxiang         | Mongolic                          | 96             | Gansu                        | (5)        |
| 13   | NE | Bonan             | Mongolic                          | 95             | Gansu                        | (6)        |
| 14   | NE | Yugur             | Turkic / Mongolic                 | 100            | Gansu                        | (7)        |
| 15   | NE | Sala              | Turkic                            | 99             | Qinghai                      | (8)        |
| 16   | TB | Pumi              | Tibeto-Burman                     | 35             | Ninglang, Lijiang, Yunnan    | (9)        |
| 17   | TB | Naxi              | Tibeto-Burman                     | 45             | Lijiang, Yunnan              | (9)        |
| 18   | SE | Va_1              | Tai-Kadai                         | 22             | Simao, Yunnan                | (10)       |
| 19   | SE | Va_2              | Tai-Kadai                         | 36             | Ximeng/Gengma, Simao, Yunnan | (11)       |
| 20   | TB | Tujia_1           | Tibeto-Burman                     | 66             | Western Hunan                | (9)        |
| 21   | TB | Tujia_2           | Tibeto-Burman                     | 31             | Yongshun, Hunan              | (9)        |
| 22   | TB | Yi_1              | Tibeto-Burman                     | 40             | Shuangbai, Yunnan            | (9)        |
| 23   | TB | Yi_2              | Tibeto-Burman                     | 16             | Xishuangbanna, Yunnan        | (9)        |
| 24   | SE | Dai_1             | Tai-Kadai                         | 21             | Xishuangbanna, Yunnan        | (10)       |
| 25   | SE | Dai_2             | Tai-Kadai                         | 38             | Xishuangbanna, Yunnan        | (12)       |
| 26   | TB | Aini              | Tibeto-Burman                     | 47             | Xishuangbanna, Yunnan        | (9)        |
| 27   | TB | Bai_1             | Tibeto-Burman                     | 40             | Dali, Yunnan                 | (9)        |
| 28   | TB | Bai_2             | Tibeto-Burman                     | 19             | Xishuangbanna, Yunnan        | (9)        |
| 29   | TB | Hani              | Tibeto-Burman                     | 33             | Xishuangbanna, Yunnan        | (9)        |
| 30   | TB | Jino              | Tibeto-Burman                     | 18             | Xishuangbanna, Yunnan        | (9)        |
| 31   | TB | Lahu_1            | Tibeto-Burman                     | 15             | Xishuangbanna, Yunnan        | (9)        |
| 32   | TB | Lahu_2            | Tibeto-Burman                     | 32             | Simao, Yunnan                | (10)       |
| 33   | TB | Lahu_3            | Tibeto-Burman                     | 35             | Lancang, Simao, Yunnan       | (11)       |
| 34   | SE | Taiwan Aborigines | Formosan, Austronesian            | 180            | Taiwan                       | (13)       |
| 35   | SH | Han_Taiwan        | Sinitic                           | 155            | Taiwan                       | (14)       |
| 36   | SH | Han_Anhui         | Sinitic                           | 42             | Hefei, Anhui                 | (15)       |
| 37   | SH | Han_Fujian        | Sinitic                           | 54             | Changtin, Fujian             | (15)       |
| 38   | SH | Han_Guangdong_1   | Sinitic                           | 30             | Zhanjiang, Ganddong          | (16)       |
| 39   | SH | Han_Guangdong_2   | Sinitic                           | 69             | Guangdong                    | (17)       |
| 40   | NH | Han_Gansu         | Sinitic                           | 45             | Gansu                        | (15)       |
| 41   | SH | Han_Guangxi       | Sinitic                           | 26             | Tianlin, Guangxi             | (15)       |
| 42   | SH | Han_Hubei         | Sinitic                           | 42             | Wuhan, Hubei                 | (16)       |
| 43   | SH | Han_Hunan_1       | Sinitic                           | 82             | Changsha, Hunan              | (18)       |
| 44   | SH | Han_Hunan_2       | Sinitic                           | 16             | Changsha, Hunan              | (15)       |
| 45   | NH | Han_Jilin         | Sinitic                           | 51             | Yan Bian, Jilin              | (19)       |
| 46   | SH | Han_Jiangsu       | Sinitic                           | 67             | Nanjing, Jiangsu             | (15)       |

| Code | G* | Population        | Language Affiliation <sup>†</sup> | N <sup>‡</sup> | Sample Location           | References    |
|------|----|-------------------|-----------------------------------|----------------|---------------------------|---------------|
| 47   | SH | Han_Jiangxi       | Sinitic                           | 23             | Nanchang, Jiangxi         | (15)          |
| 48   | NH | Han_Liaoning_1    | Sinitic                           | 51             | Fengcheng, Liaoning       | (16)          |
| 49   | NH | Han_Liaoning_2    | Sinitic                           | 51             | Dalian, Liaoning          | (15)          |
| 50   | NH | Han_Neimeng       | Sinitic                           | 45             | Chifeng, Neimeng          | (15)          |
| 51   | NH | Han_Qinghai       | Sinitic                           | 44             | Xining, Qinghai           | (15)          |
| 52   | SH | Han_Sichuan       | Sinitic                           | 70             | Weicheng, Sichuan         | (15)          |
| 53   | NH | Han_Shandong_1    | Sinitic                           | 50             | Qingdao, Shandong         | (16)          |
| 54   | NH | Han_Shandong_2    | Sinitic                           | 76             | Tai'an, Shandong          | (20)          |
| 55   | SH | Han_Shanghai      | Sinitic                           | 56             | Shanghai                  | (15)          |
| 56   | SH | Han_Shanghai      | Sinitic                           | 120            | Shanghai                  | (21)          |
| 57   | NH | Han_Shaanxi_1     | Sinitic                           | 85             | Xi'an, Shaanxi            | (18)          |
| 58   | NH | Han_Shaanxi_2     | Sinitic                           | 53             | Xi'an, Shaanxi            | (15)          |
| 59   | NH | Han_Xinjiang      | Sinitic                           | 47             | Yili, Xinjiang            | (16)          |
| 60   | SH | Han_Yunnan_1      | Sinitic                           | 43             | Kunming, Yunnan           | (16)          |
| 61   | SH | Han_Yunnan_2      | Sinitic                           | 58             | Huize, Yunnan             | (15)          |
| 62   | SH | Han_Zhejiang      | Sinitic                           | 61             | Hangzhou, Zhejiang        | (15)          |
| 63   | TB | Nakchu_Tibetan    | Tibetic                           | 168            | Nakchu, Tibet             | Present study |
| 64   | TB | Shigatse_Tibetan  | Tibetic                           | 220            | Shigatse, Tibet           | Present study |
| 65   | TB | Tibet_Tibetan     | Tibetic                           | 54             | Tibet                     | (22)          |
| 66   | TB | Qinghai_Tibetan_1 | Tibetic                           | 56             | Qinghai                   | (9)           |
| 67   | TB | Qinghai_Tibetan_2 | Tibetic                           | 76             | Qinghai                   | Present study |
| 68   | TB | Yunnan_Tibetan_1  | Tibetic                           | 35             | Zhongdian, Diqing, Yunnan | (9)           |
| 69   | TB | Yunnan_Tibetan_2  | Tibetic                           | 24             | Diqing, Yunnan            | (10)          |
| 70   | TB | Yunnan_Tibetan_3  | Tibetic                           | 71             | Diqing, Yunnan            | Present study |
| 71   | TB | Sichuan_Tibetan   | Tibetic                           | 62             | Liangshan, Sichuan        | Present study |
| 72   | TB | Gansu_Tibetan     | Tibetic                           | 83             | Gannan, Gansu             | Present study |

Notes: \* Abbreviations “NE”, “TB”, “SE”, “NH” and “SH” refers to the northern ethnic groups,

Tibeto-Burman speaking populations, southern (autochthonous) ethnic groups, Northern Han

Chinese and Southern Han Chinese, respectively; <sup>†</sup> Classified according to the Ethnologue:

Languages of the World (<http://www.ethnologue.com/>); <sup>‡</sup> Number of samples under study.

1. Kong Q-P, *et al.* (2003) Mitochondrial DNA sequence polymorphisms of five ethnic populations from northern China. *Hum Genet* 113:391-405.
2. Yao Y-G, Kong Q-P, Wang C-Y, Zhu C-L, Zhang Y-P (2004) Different matrilineal contributions to genetic structure of ethnic groups in the Silk Road region in China. *Mol Biol Evol* 21:2265-2280.
3. Yao Y-G, Lu X-M, Luo H-R, Li W-H, Zhang Y-P (2000) Gene admixture in the Silk Road region of China: evidence from mtDNA and melanocortin 1 receptor polymorphism. *Genes Genet Syst* 75:173-178.

4. Zhang Y, *et al.* (2005) Haplotype diversity in mitochondrial DNA hypervariable region I, II and III in a Korean ethnic group from northeast China. *Forensic Sci Int* 151:299-301.
5. Liu X-S, Chen T, Li S-B (2004) Sequence polymorphism of human mitochondrial DNA control region in Chinese Dongxiang unrelated individuals. *J Med Coll PLA* 19:259-262.
6. Liu X-S, Li S-B (2003) Polymorphism of mitochondrial DNA D-loop region in Chinese Baoan ethnic group. *J Fourth Mil Med Univ* 24:1832-1836.
7. Liu X-S, Li S-B (2004) Mitochondrial DNA Polymorphism in control region from Chinese Yugu population. *Acad J Xi'an Jiaotong Univ* 16:174-177.
8. Liu X-S, Li S-B (2004) Study on polymorphisms of mitochondrial DNA D-loop region in the Sala population in China. *J Xi'an Jiaotong Univ (Med Sci)* 25:213-216.
9. Wen B, *et al.* (2004) Analyses of genetic structure of Tibeto-Burman populations reveals sex-biased admixture in southern Tibeto-Burmans. *Am J Hum Genet* 74:856-865.
10. Qian Y-P, *et al.* (2001) Mitochondrial DNA polymorphisms in Yunnan nationalities in China. *J Hum Genet* 46:211-220.
11. Yao Y-G, Zhang Y-P (2002) Phylogeographic analysis of mtDNA variation in four ethnic populations from Yunnan Province: new data and a reappraisal. *J Hum Genet* 47:311-318.
12. Yao Y-G, *et al.* (2002) Genetic relationship of Chinese ethnic populations revealed by mtDNA sequence diversity. *Am J Phys Anthropol* 118:63-76.
13. Tajima A, *et al.* (2003) Mitochondrial DNA polymorphisms in nine aboriginal groups of Taiwan: implications for the population history of aboriginal Taiwanese. *Hum Genet* 113:24-33.
14. Tsai LC, *et al.* (2001) Sequence polymorphism of mitochondrial D-loop DNA in the Taiwanese Han population. *Forensic Sci Int* 119:239-247.
15. Wen B, *et al.* (2004) Genetic evidence supports demic diffusion of Han culture. *Nature* 431:302-305.
16. Yao Y-G, Kong Q-P, Bandelt H-J, Kivisild T, Zhang Y-P (2002) Phylogeographic differentiation of mitochondrial DNA in Han Chinese. *Am J Hum Genet* 70:635-651.
17. Kivisild T, *et al.* (2002) The emerging limbs and twigs of the East Asian mtDNA tree. *Mol Biol Evol* 19:1737-1751.
18. Oota H, *et al.* (2002) Extreme mtDNA homogeneity in continental Asian populations. *Am J*

*Phys Anthropol* 118:146-153.

19. Zhang YJ, Xu QS, Zheng ZJ, Lin HY, Lee JB (2005) Haplotype diversity in mitochondrial DNA hypervariable region I, II and III in northeast China Han. *Forensic Sci Int* 149:267-269.
20. Yao Y-G, Kong Q-P, Man X-Y, Bandelt H-J, Zhang Y-P (2003) Reconstructing the evolutionary history of China: a caveat about inferences drawn from ancient DNA. *Mol Biol Evol* 20:214-219.
21. Nishimaki Y, *et al.* (1999) Sequence polymorphism in the mtDNA HV1 region in Japanese and Chinese. *Leg Med (Tokyo)* 1:238-249.
22. Torroni A, *et al.* (1994) Mitochondrial DNA analysis in Tibet: implications for the origin of the Tibetan population and its adaptation to high altitude. *Am J Phys Anthropol* 93:189-199.
